17 **Abstract**

18 The activity in the default mode network (DMN) rapidly fluctuates in different conscious  
19 stages during wakefulness and sleep, indicating high complexity for the role of DMN in  
20 consciousness. Tracking the dynamics of these fluctuations is critical for deeply understanding  
21 the physiological mechanism of consciousness. Here, we propose a coactive micropattern  
22 (CAMP) method to extract the dynamic configuration of local field potentials (LFPs) in the  
23 rat DMN. Three spatially stable CAMPs were detected from DMN gamma activity (40-80 Hz)  
24 across wakefulness and sleep, consisting of a common low-activity level micropattern, an  
25 anterior high-activity level micropattern and a posterior high-activity level micropattern.  
26 Temporal structures of these CAMPs were specific to different conscious stages. A dynamic  
27 balance across CAMPs emerged during wakefulness and was disrupted in sleep stages,  
28 demonstrating that the balanced dynamic configuration of CAMPs played a vital role in  
29 supporting higher cognitive functions and primary consciousness. Furthermore, all these  
30 CAMPs displayed strong phasic relationships to the up-down states of the slow DMN activity  
31 during deep sleep. Our study reveals that the consciousness levels of different conscious stages  
32 are determined by the dynamic configurations of DMN activity, and provides a potential three-  
33 state model for the consciousness during wakefulness and sleep.

34 **Keywords:** default mode network; coactive micropattern; wakefulness and sleep; up-down  
35 states; dynamic configuration

## 36 **1. Introduction**

37 Multimodal imaging studies of the human brain have discovered that several intrinsic  
38 connectivity networks (ICNs) co-exist during the resting state(Beckmann et al., 2005; Liu et  
39 al., 2017). Dynamic switching within these ICNs displays a hierarchical structure over time  
40 for the brain activity at rest and is significantly associated with the cognitive traits(Fox et al.,  
41 2016; Vidaurre et al., 2017), suggesting that brain activity is appropriately understood in terms  
42 of the dynamic configuration among ICNs. These studies mainly consider each ICN as a whole  
43 during brain dynamics but ignore the intrinsic dynamics of individual ICN. Indeed, individual  
44 ICN also shows strong fluctuations in brain activity and different ICNs are believed to  
45 dominate distinct cognitive functions(Rosazza and Minati, 2011). For a specific brain function,  
46 further tracking the dynamic configuration of fluctuations in brain activity at single-ICN level  
47 might be critical to reveal the physiological mechanism underlying it.

48 As a task-negative ICN, the default mode network (DMN) has been highlighted and  
49 progressively refined as the key neural correlate of consciousness(Fox et al., 2018; Gusnard  
50 et al., 2001; Raichle, 2015; Raichle et al., 2001). DMN connectivity between the frontal and  
51 posterior areas is reduced during the slow wave sleep (SWS) stage(Sämman et al., 2011), which  
52 displayed low level of consciousness. However, at sleep onset and throughout the rapid eye  
53 movement sleep (REM) stage with primary consciousness(Hobson, 2009), the DMN regions  
54 persisted in their couplings(Horovitz et al., 2008; Larson-Prior et al., 2009). These findings  
55 illustrate that DMN activity is functionally reorganized during sleep and might further reflect  
56 levels of consciousness. Additionally, fast and ever-changing dynamics of DMN activity have  
57 also been observed in various consciousness levels, and the temporal aspects of spontaneous  
58 DMN activity might be associated with conscious processes(Kapogiannis et al., 2014; Panda

59 et al., 2016). Therefore, the close association between DMN activity and consciousness  
60 represents an important topic to study for an understanding of the physiological mechanism of  
61 consciousness by revealing the dynamic configuration of fast DMN activity, which has not  
62 been completely elucidated.

63 On the other hand, recent neurophysiological studies identified the up-down state as a  
64 biomarker of low-level consciousness, particularly in the deep sleep stage and anesthesia. The  
65 up-down state refers to the alternate epochs in which neurons in various brain regions increase  
66 and decrease their firing rates in a highly synchronized and stepwise manner at a rate of  
67 approximately 0.5–2 Hz (Amzica and Steriade, 1995; Petersen et al., 2003). Moreover, this up-  
68 down state emerges in both neuron membrane potentials and local field potentials  
69 (LFPs) (Holcman and Tsodyks, 2006), and characterizes the dynamics of slow oscillations  
70 during deep sleep (Ji and Wilson, 2007; Lőrincz et al., 2015). However, researchers are still  
71 debating the existence of a physiological relationship between the up-down state and the DMN  
72 dynamics, another issue that deserves further exploration.

73 In the present study, we developed and applied a new dynamic activity pattern method to  
74 address these challenges. The proposed method extracted the dynamic configuration of fast  
75 neural activity in different conscious stages based on the coactive phenomena in envelope  
76 activity from multi-channels physiological signals. The new method—the coactive micropattern  
77 analysis (CAMP)—decomposed the dynamics of neural activity into several instinct CAMPs  
78 and defined the configurations across time through the constitutions and transitions among  
79 these CAMPs. We then applied the CAMP analysis to the recorded LFPs from rat DMN during  
80 wakefulness and sleep. Our results demonstrated the reorganized dynamic configurations of  
81 CAMPs for the fast DMN activity in different conscious stages, implying that the dynamic

82 configurations of DMN micropatterns might provide underlying neural correlates for the  
83 consciousness levels observed during wakefulness and sleep.

## 84 **2. Material and Methods**

85 **2.1. Dataset.** Twenty-nine male Sprague-Dawley rats were used in our experiment. Firstly,  
86 fifteen electrodes, including seven epidural cortical electrodes and eight depth electrodes, were  
87 implanted into the brain of each rat under deep anesthesia (sodium pentobarbital, 60 mg/kg  
88 body weight, i.p.) at the coordinates proposed by Lu(Lu et al., 2012) (Fig. 1, Table 1). The  
89 reference electrode was placed in the cerebellum, and two electromyographic (EMG)  
90 electrodes were implanted bilaterally in the dorsal neck muscles. Here the cerebellum was  
91 chosen for the placement of the reference electrode, for that there was lower neural activity in  
92 the cerebellum and the cerebellum was not involved in many cognitive functions. Notably, 0.6  
93 ml of atropine sulfate (0.5 mg/ml, s.c.) was injected during electrode implantation to prevent  
94 excess secretions from the respiratory tract. Meanwhile, the body temperature of the rats was  
95 maintained at 37 degrees centigrade with a heating pad. Then, all electrodes were welded to  
96 connectors and fixed on the skull of the rat with dental acrylic. After the surgical procedure,

|            | <b>A-P</b> | <b>M-L</b> | <b>D-V</b> |
|------------|------------|------------|------------|
| <b>PrL</b> | 4.2        | $\pm 0.8$  | 3          |
| <b>OFC</b> | 3.7        | $\pm 1.8$  | 4.7        |
| <b>CG</b>  | 1.7        | $\pm 0.7$  | 2.6        |
| <b>RSC</b> | -3.3       | 0          | 0          |
| <b>HIP</b> | -4.3       | $\pm 1.4$  | 3          |
| <b>PPC</b> | -4.5       | $\pm 4$    | 0          |
| <b>V2</b>  | -5.2       | $\pm 2.4$  | 0          |
| <b>TE</b>  | -5.2       | $\pm 8$    | 5          |

97 **Table 1.** Coordinates of the 15 electrodes (mm). A-P, M-L, and D-V indicate anterior-posterior, medial-  
98 lateral, and dorsal-ventral directions, respectively. PrL, prelimbic cortex; OFC, orbital cortex; CG,  
99 cingulate cortex; RSC, retrosplenial cortex; HIP, hippocampus; PPC, posterior parietal cortex; V2,  
100 secondary visual cortex; TE, temporal association cortex.

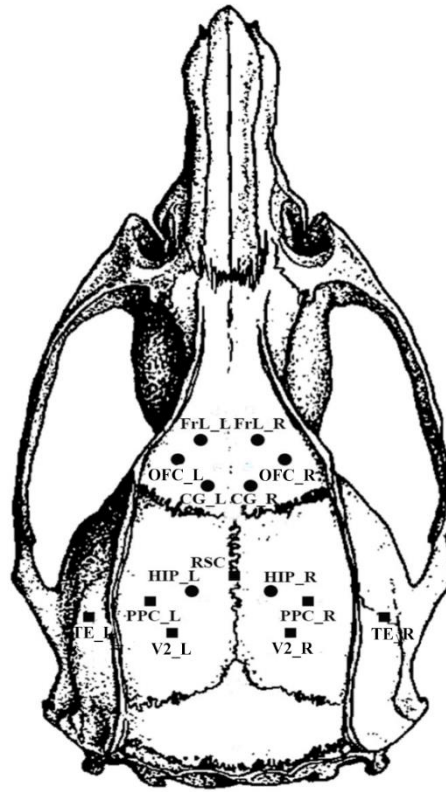

■ epidural electrode ● depth electrode

101

102 **Fig. 1.** The placement of 15 intracranial electrodes.

103 penicillin G was administered to prevent infection, and all rats were allowed at least 2 weeks

104 for recovery before the recording session started. All experimental animal procedures were

105 approved by the Institutional Animal Care and Use Committee of the University of Electronic

106 Science and Technology of China.

107 Prior to the recording sessions, the rats were habituated to the experimental environment

108 and the recording cable for 2 days. During the recording session, all rats were placed in a glass

109 box on a 12-h light/dark cycle (lights on at 8:00 am). Each recording electrode was connected

110 to an acquisition system (Chengyi, RM62160, China). Electrophysiological signals (LFPs) and

111 videos were synchronously and continuously acquired for 72 h. The amplified and filtered

112 (0.16–100 Hz for LFPs, 8.3–500 Hz for electromyogram (EMG), and 50-Hz notch filter)

113 signals were stored on a hard disk (Lenovo Company, USA), and the sample frequency was

114 set to 1,000 Hz. All experiments were performed in a noise-attenuated room, where the  
115 background noise was set to  $32.2 \pm 3.0$  dB and the temperature was maintained at  $25 \pm 0.5$   
116 degrees centigrade. The experimenter entered the noise-attenuated room to replace food and  
117 water and clean cages at 12:00 am daily.

118 The dataset used in the current study was selected from the last 24 h of the total recording  
119 and was separated into three stages, including the resting (AWAKE), slow wave sleep (SWS)  
120 and rapid eye movement (REM) sleep stages. The rules for selecting each stage were based on  
121 LFP, EMG and videos, which have been summarized in our previous publications(Jing et al.,  
122 2017). Briefly, the scoring of the awake and sleep stages were performed by several experts.  
123 We included 29 rats in the current study. For each rat, 30 segments in different stages were  
124 recorded, and each segment lasted 10 s (a total of 300 s of LFPs).

125 **2.2. The coactive micropattern (CAMP) algorithm.** Using functional magnetic resonance  
126 imaging (fMRI) data, Liu and colleagues(Liu et al., 2013; Liu and Duyn, 2013) used the  
127 coactive pattern method, a point process approach, to identify a set of CAPs with relevant  
128 network features to resting state networks, including the default mode network (DMN). In the  
129 present study, we developed a coactive micropattern (CAMP) measurement and specifically  
130 employed it to analyze neurophysiological data. An overview and procedure of the CAMP  
131 method is shown in Fig. 2. This method was used to extract CAMPs based on the extreme  
132 values of envelope signals at a high temporal resolution and reveal the fast dynamics of  
133 multichannel LFPs.

134 Several steps were involved in the CAMP method. First, the original data were bandpass  
135 filtered into specific frequency bands. In our study, we filtered the original LFPs into the  
136 gamma (40-80 Hz) frequency band for the neural correlation between DMN gamma oscillation

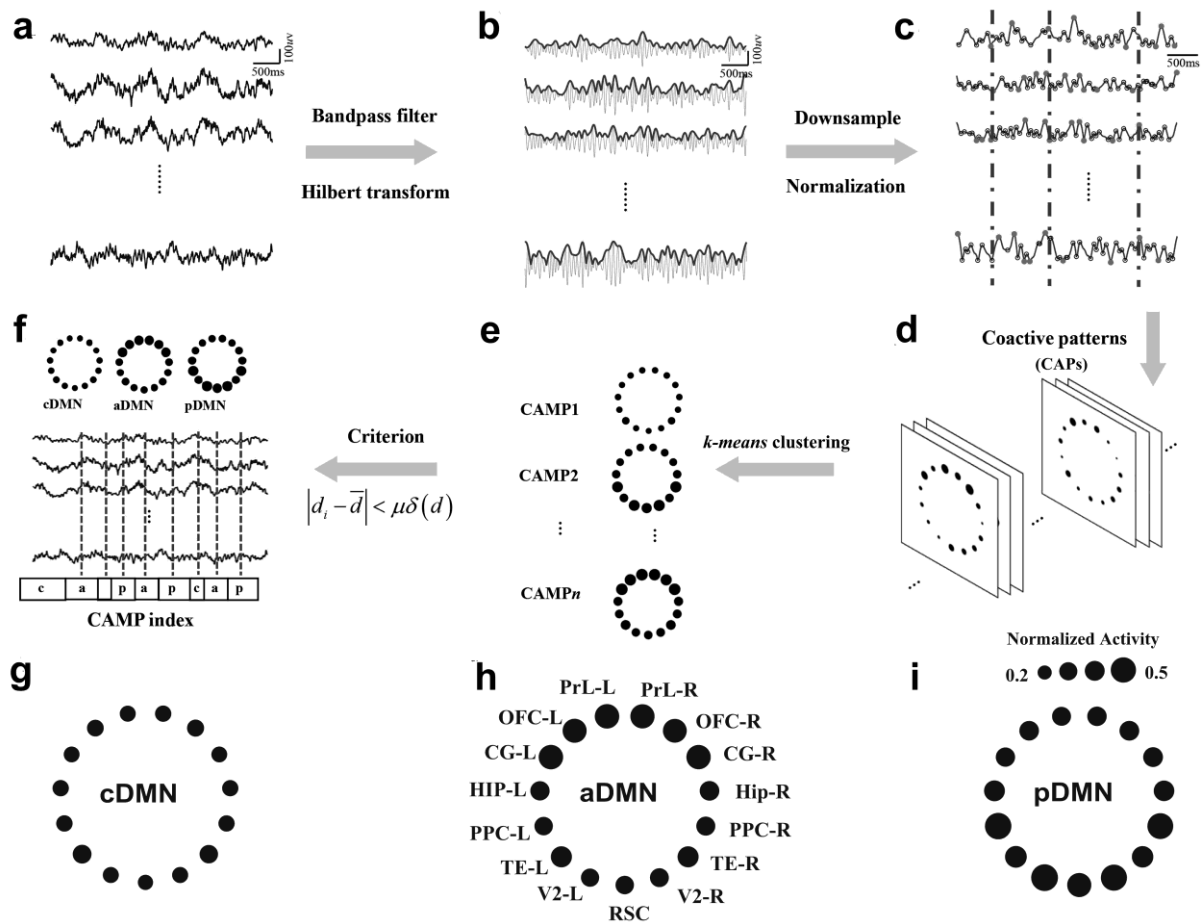

137

138 **Fig. 2.** Schematic of the CAMP procedure and three CAMPs of gamma activity in the DMN during

139 wakefulness and sleep. (a) The original LFPs. (b) The envelope signals (blue lines) were extracted by

140 applying the Hilbert transform to the bandpass-filtered signals (gray lines). (c) All the envelope signals

141 were downsampled (blue lines), and the extreme values were detected as the active points for each

142 channel (red dots). The dotted lines suggest the coactive points in which more than N (N=7 in the

143 present study) active points were observed across DMN regions. (d) The coactive patterns were the

144 maps of activity of all DMN regions at coactive points. (e) The k-means clustering algorithm was

145 applied to all coactive patterns to detect the CAMPs. (f) A criterion was employed to remove several

146 coactive points and increase the aggregation of the CAMPs. The final CAMPs and CAMP index

147 detected in this step were subjected to further analyses. (g) Spatial structure of the common low-activity

148 level micropattern (cDMN). (h) Spatial structure of the anterior high-activity level micropattern

149 (aDMN). (i) Spatial structure of the posterior high-activity level micropattern (pDMN).

150

151 with the cognitive functions. Second, the Hilbert transform was applied to the filtered data to



152 obtain the envelope signals (Fig. 2b). These envelope signals were normalized and  
153 downsampled (from 1,000 Hz to 100 Hz) to improve the signal-to-noise ratio (SNR) (Fig. 2c).  
154 The envelope signals were normalized by restricting the maximum value of the normalized  
155 envelope signal to 0.9 and the minimum value to 0.1. Third, the active points for each channel  
156 of envelope signals were then defined as the extreme points of the envelope signals, including  
157 local maximum and minimum values. Afterwards, the coactive patterns (CAPs) of the brain  
158 were introduced from normalized and down-sampled envelope signals for all states. The CAPs  
159 were the brain maps in which more than one brain region displayed active points at the same  
160 time point (Fig. 2d), and totally there were 1724646 CAPs that were extracted. Thus, we  
161 considered the number of brain regions with active points at the same time (parameter  $N$ ) as  
162 one important parameter for extracting these coactive patterns.

163 After extracting the CAPs from envelope signals, we employed the k-means clustering  
164 algorithm to all the CAPs based on their spatial similarity to decompose the CAPs (Fig. 2e).  
165 By clustering the CAPs into several distinct groups, we temporally divided the brain activity  
166 into multiple CAMPs. We repeated the k-means clustering with  $k = 2, \dots, 10$  and applied the  
167 contour coefficient estimation (i.e., the sum of the squared errors, SSE) to determine the  
168 optimal number of distinct groups and select the optimal number of CAMPs. The optimal  
169 number of CAMPs was 3 in our study, according to the elbow of the curve between the  $k$   
170 values and SSE values (Supplementary Fig. 1b).

171 Next, the CAMPs were fit back to the coactive patterns (CAPs), assigning each CAP to  
172 the CAMP class with the lowest squared Euclidean distance to the three CAMPs. The CAMP  
173 index was then obtained from the assignment, which showed the temporal sequence of CAMPs  
174 in the gamma activity of the DMN. Then, we carefully updated the CAMPs and CAMP index

175 according to the CAPs that belong to the same CAMP class using the following criterion:  
176  $|d_i - \bar{d}| < \mu \delta(d)$ , where  $d_i$  is the squared Euclidean distance between the  $i$ th coactive  
177 pattern with its assigned CAMP,  $\bar{d}$  is the mean of all distance,  $\delta(d)$  is the standard  
178 deviation of these distance, and  $\mu$  is the penalty parameter we determined. If the distance  
179 did not conform to this criterion, then we removed the assignment of the corresponding CAPs  
180 from any CAMP class (Fig. 2f). Afterwards, we applied the k-means clustering algorithm to  
181 all remaining original CAPs using the same  $k$  value detected previously and redefined the  
182 clusters. This step was iterated until all distances obeyed this criterion. Using this criterion,  
183 we precisely determined the final spatial structures of CAMPs and the CAMP index. Notably,  
184 if the CAP was not assigned to any CAMP, we removed it from the CAMP index. 261344  
185 CAPs were removed based on this criterion and there were 1463303 CAPs used in subsequent  
186 analysis. The final CAMP index only contained the assignments of all CAPs to their  
187 corresponding CAMPs.

188 In the present study, we calculated the number of CAPs for different N values ranging  
189 from 2 to 15 (Supplementary Fig. 1a) and decomposed the CAMPs from these CAPs. Under  
190 different N values, the derived CAMPs exhibited similar spatial structures (Supplementary  
191 Fig. 2). Therefore, considering the complexity of the calculation and requirement for  
192 additional information about DMN dynamics, we finally set N to 7 in the current study.  
193 Additionally, we also altered the penalty parameter  $\mu$  from 1.5 to 3 (step size of 0.1) and  
194 described how the proportion of removed CAPs varied with different  $\mu$  values  
195 (Supplementary Fig 1c). By extracting the CAMPs with different  $\mu$  values, we observed  
196 similar spatial structures of these CAMPs, implying that the penalty parameter might not affect  
197 the CAMPs (Supplementary Fig. 3). Therefore, we finally set the value of this parameter to 2

198 in the subsequent analysis.

199 All our analyses of the CAMP algorithm were performed using our own custom MATLAB  
200 (release 2019a) scripts and the scripts for CAMP algorithm are available in the Mendeley  
201 website ([https://data.mendeley.com/datasets/p522rj449p/draft?a=0ef3b254-520e-456e-b257-](https://data.mendeley.com/datasets/p522rj449p/draft?a=0ef3b254-520e-456e-b257-c398ef632148)  
202 [c398ef632148](https://data.mendeley.com/datasets/p522rj449p/draft?a=0ef3b254-520e-456e-b257-c398ef632148)). If a special description was not included, we extracted the CAMPs of all the  
203 CAPs from whole segments acquired from rats in all three conscious stages. For every segment,  
204 the CAMPs were obtained by averaging the CAPs belonging to their corresponding clusters  
205 in that segment. Meanwhile, the CAMP index of each segment was also acquired from the  
206 total CAMP index.

207 **2.3. Estimation of the CAMP features.** In the present study, we employed five measurements  
208 to characterize the features of CAMPs and the CAMP index of each segment.

209 The total occurrence represented the number of CAPs assigned to each CAMP, and the  
210 occurrence probability was the proportion of the total occurrence of the number of all CAPs.

211 The total duration characterized the entire time required for each CAMP and the duration  
212 probability represented the proportion of that.

213 The duration of one CAP was defined as follows: the start time was the mid-point between  
214 the time point of this CAP and the preceding CAP, and the end time was the mid-point between  
215 the time point of this CAP and the next CAP.

216 We first defined the event for each CAMP to determine the mean duration of each CAMP.  
217 An event for each CAMP was that the coactive pattern before or after it should be different  
218 from itself. Thus, in the CAMP index, if the neighboring CAPs belonged to the same CAMP,  
219 then they should be included in one event for that CAMP. Using this approach, we obtained a  
220 new CAMP index in which the neighboring coactive patterns did not belong to the same

221 CAMP. We separately estimated the numbers of events for all CAMPs, and the mean duration  
222 for each CAMP was calculated by dividing the total duration by the number of events for that  
223 CAMP.

224 All values of these CAMP features were calculated for each segment (10 s). The values  
225 of these features were averaged based on the rat and conscious stage to which they belonged  
226 to calculate the values of CAMP features for each rat in different conscious stages.

227 **2.4. Transition probabilities (TPs) for pairs of CAMPs.** The transition probabilities for pairs  
228 of CAMPs were the one-step and direct transitions among them. These TPs were separately  
229 estimated from the new CAMP index for each segment. Six types of direct transitions were  
230 identified in the new CAMP index. The TP for one direct transition was calculated by dividing  
231 the number of this transition by the total number of all direct transitions.

232 **2.5. Reliability test for the three CAMPs across the 29 rats and different conscious stages.**  
233 We initially applied the CAMP analysis to the segments obtained from each rat in the AWAKE,  
234 SWS and REM sleep stages to assess the reliability of these CAMPs. Three different CAMPs  
235 were identified for each for each rat in each conscious stage (29\*3\*3 total CAMPs).

236 The reliability of CAMPs across rats was determined by estimating the correlation  
237 coefficients of the CAMPs among pairs of rats in the same conscious stage using the Pearson  
238 correlation method. These correlation coefficients were then averaged to obtain the reliability  
239 of each CAMP in each conscious stage (3\*3). For different conscious stages, we next averaged  
240 the correlations across CAMPs and obtained the reliabilities of all CAMPs for each stage.

241 For the analysis of the reliability of CAMPs across different conscious stages, we first  
242 estimated the correlation coefficients of CAMPs among pairs of conscious stages for each rat  
243 (29\*3\*3). Then, the whole correlation coefficient was averaged and the reliability of CAMPs

244 across stages was obtained (3\*3).

245 **2.6. Randomization test for the CAMP index.** The randomization tests were applied to the  
246 new CAMP indices in the AWAKE, SWS and REM sleep stages(Lehmann et al., 2005). The  
247 null hypothesis was that if the transition from a preceding CAMP to the next CAMP occurred  
248 randomly, then the observed TPs would depend on the occurrence probability of CAMPs.  
249 During the test, we considered the expected TP from CAMP  $X$  to CAMP  $Y$  to be

$$250 \quad P_{X \rightarrow Y}^* = P_X P_Y / (1 - P_X), \quad (1)$$

251 where  $P_X$  ( $P_Y$ ) is the occurrence probability for CAMP  $X$  ( $Y$ ). The difference between the  
252 expected TP and the observed TP was then assessed by calculating the chi-square distance

$$253 \quad \sum_{X,Y} (P_{X \rightarrow Y} - P_{X \rightarrow Y}^*)^2 / P_{X \rightarrow Y}^*, \quad (2)$$

254 where the sum was calculated for all 6 pairs of CAMPs for which  $X \neq Y$ . The randomization  
255 test (permutation test) was then performed to statistically analyze the significance of this  
256 distance between the observed TP and expected TP. The permutation test was performed by  
257 shuffling the order of coactive patterns. The number of randomizations in the permutation test  
258 was set to 10,000 in our study, and the probability was determined by the rank of the observed  
259 difference among the randomly obtained differences.

260 **2.7. Phasic relationships between CAMPs and up-down states in the slow oscillations of**  
261 **the DMN during deep sleep.** We first averaged the DMN activity to obtain the activity of  
262 anterior DMN and posterior DMN in the SWS stage and to assess the phasic relationship  
263 between CAMPs and up-down states. The average activity was then bandpass-filtered at 0.5-  
264 2 Hz and downsampled from 1,000 Hz to 100 Hz, which coincided with the CAMP algorithm.  
265 Using this approach, we finally obtained the downsampled slow oscillations in the anterior  
266 DMN and posterior DMN regions. Then, the Hilbert transform was applied to these slow

267 oscillations to obtain the instantaneous phase for both slow activity in the anterior DMN and  
268 posterior DMN activity. By combining the acquired instantaneous phase and timing of each  
269 CAMP, we obtained the instantaneous phases of all CAMPs in the slow activity of the anterior  
270 DMN and posterior DMN, and the distributions of phases for the cDMN, aDMN and pDMN  
271 in the SWS stage. Finally, we employed the Rayleigh test to analyze the non-uniformity of  
272 these distributions of phases for the three CAMPs.

273 **2.8. Statistical analysis.** The statistical comparisons of the CAMP features and the TPs among  
274 CAMPs across the three stages were performed using the methods described below. First, an  
275 ANOVA was performed among all three stages, and then Student's t test was performed as the  
276 post hoc test to determine the significance of differences between pairs of stages. In addition,  
277 the p values derived from Student's t tests were corrected with the false discovery rate (FDR)  
278 correction.

### 279 **3. Results**

280 **3.1. Three CAMPs of gamma activity in the DMN during wakefulness and sleep.** The  
281 CAMP analysis procedure developed in the present study is schematically illustrated in Fig. 2  
282 and section 2.2. The concatenated gamma activity in the DMN of all rats and all stages during  
283 wakefulness and sleep was decomposed into three distinct CAMPs, including a common low-  
284 activity level micropattern (cDMN), an anterior high-activity level micropattern (aDMN) and  
285 a posterior high-activity level micropattern (pDMN). In the cDMN, all DMN regions showed  
286 similar and low levels of activity (mean normalized activity:  $0.2577 \pm 0.0041$ , Fig. 2g),  
287 indicating a potential cooperation of these regions in this type of CAMP. However, two  
288 different levels of activity were observed in both the aDMN and pDMN. The aDMN exhibited  
289 relatively higher levels of activity in the anterior DMN regions (i.e., the prelimbic cortex (PrL),

|              | <b>cDMN</b> | <b>aDMN</b> | <b>pDMN</b> | <b>Mean Reliability</b> |
|--------------|-------------|-------------|-------------|-------------------------|
| <b>AWAKE</b> | 0.5806      | 0.8043      | 0.8504      | 0.7451                  |
| <b>SWS</b>   | 0.7588      | 0.6472      | 0.8544      | 0.7535                  |
| <b>REM</b>   | 0.4257      | 0.6951      | 0.8843      | 0.6684                  |

290 **Table 2.** The reliabilities (correlation coefficients) of CAMPs in the three stages across rats.

|             | <b>AWAKE vs. SWS</b> | <b>AWAKE vs. REM</b> | <b>SWS vs. REM</b> | <b>Mean Reliability</b> |
|-------------|----------------------|----------------------|--------------------|-------------------------|
| <b>cDMN</b> | 0.7214               | 0.6352               | 0.5122             | 0.6229                  |
| <b>aDMN</b> | 0.7910               | 0.8650               | 0.7087             | 0.7882                  |
| <b>pDMN</b> | 0.8406               | 0.9091               | 0.8302             | 0.8600                  |

291 **Table 3.** The reliabilities (correlation coefficients) of CAMPs across the three conscious stages.

292

293 the orbitofrontal cortex (OFC) and the cingulate gyrus (CG), mean normalized activity: 0.3868  
 294  $\pm$  0.0018) and lower activity in the posterior DMN structures (i.e., the hippocampus (HIP), the  
 295 posterior parietal cortex (PPC), the visual cortex area (V2) and the retrosplenial cortex (RSC),  
 296 mean normalized activity: 0.3050  $\pm$  0.0060, Fig. 2h). In the pDMN, the posterior DMN  
 297 structures displayed higher levels of activity (mean normalized activity: 0.3793  $\pm$  0.0145),  
 298 while the anterior DMN regions showed relatively lower levels of activity (mean normalized  
 299 activity: 0.3073  $\pm$  0.0021, Fig. 2i). Accordingly, both the aDMN and pDMN were considered  
 300 the high-activity micropatterns in DMN dynamics.

301 We separately decomposed the CAMPs for each rat in every conscious stage and tested  
 302 their reliability across all 29 rats and different conscious stages by calculating the Pearson  
 303 correlation coefficient to assess the spatial stability of these detected CAMPs. All three  
 304 CAMPs exhibited high stability with large correlation coefficients among different rats during  
 305 wakefulness and sleep (mean correlation coefficients:  $r = 0.7451$ ,  $r = 0.7535$ ,  $r = 0.6684$  for  
 306 the AWAKE stage, SWS stage and REM sleep stage, respectively; Table 2). Besides, the spatial  
 307 structures of these CAMPs were also similar in distinct conscious stages (mean correlation  
 308 coefficients:  $r = 0.6229$ ,  $r = 0.7882$ ,  $r = 0.8600$  for AWAKE stage, SWS stage and REM sleep

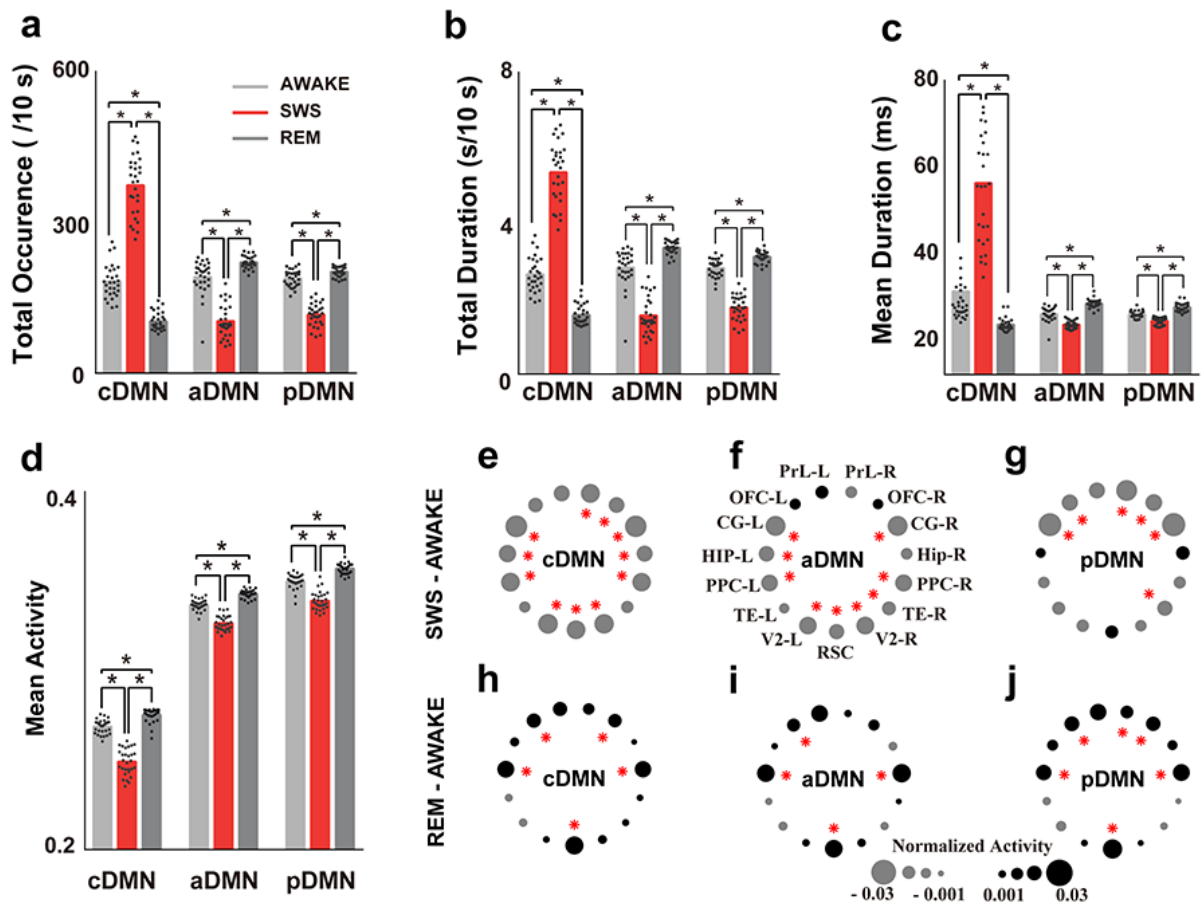

309

310

311

312

313

314

315

316

317

318

319

320

321

322

323

**Fig. 3.** Comparisons of the temporal features and activity levels of each CAMP during wakefulness and sleep. (a) Comparisons of the total occurrence of each CAMP in different conscious stages. The dots represent the values obtained from 29 rats, and the black stars indicate significant differences with a corrected  $p < 0.001$ . (b) Comparisons of the total duration. (c) Comparisons of the mean duration. (d) Comparisons of the mean DMN activity during wakefulness and sleep for different CAMPs. (e-j) Comparisons of activity in DMN nodes for different CAMPs across different conscious stages: (e and h) cDMN, (f and i) aDMN, and (g and j) pDMN. Gray dots indicate decreased normalized activity and black dots indicate increased normalized activity. The size of the dot reflects the value of the difference, and the red stars indicate significance differences with a corrected  $p < 0.001$ . These findings demonstrated high reliability and robustness of these CAMPs.

### 3.2. The temporal features and activity levels of each CAMP during wakefulness and

**sleep.** We computed several temporal measurements to characterize the features and dynamics



324 of these CAMPS during wakefulness and sleep, including the total occurrence (occurrence  
325 probability), the total duration (duration probability) and the mean duration. All these features  
326 represented the temporal properties of these CAMPS in different conscious stages. Based on  
327 the comparisons, all features of the low-activity micropattern cDMN displayed the largest  
328 values in the SWS stage and the smallest values in the REM sleep stage, and the two high-  
329 activity micropatterns (i.e., the aDMN and pDMN) exhibited the largest values for all features  
330 in the REM sleep stage and the smallest values in the SWS stage (Fig. 3a-3c). These opposite  
331 alterations in features between low-activity micropatterns and high-activity micropatterns  
332 above-mentioned comparisons were also highly significant, implying that the alterations in the  
333 suggested that these two types of CAMPS observed in DMN dynamics might represent  
334 different physiological characteristics of consciousness during wakefulness and sleep. The  
335 CAMP features in different conscious stages were remarkable and would help improve our  
336 knowledge of the changes in consciousness during wakefulness and sleep.

337 However, all of these CAMPS displayed different activities in DMN regions during  
338 wakefulness and sleep. In particular, all DMN regions exhibited reduced activity during SWS  
339 stages in all CAMPS (Fig. 3e-3g). Moreover, the regions with significantly reduced activity in  
340 the aDMN were the posterior DMN structures, and the regions with significantly reduced  
341 activity in the pDMN were the anterior DMN regions, which all showed relatively lower  
342 activity in the AWAKE stage. The significant decrease in the activity of regions with a lower  
343 level activity indicated a preservation of the major activity in high-activity micropatterns in  
344 deep sleep (Fig. 3f-3g, red stars). However, all CAMPS displayed increased activity in most  
345 DMN regions during the REM sleep stage. The activity in the HIP, OFC and RSC regions was  
346 significantly increased during the REM sleep stage in all CAMPS, implying the importance of

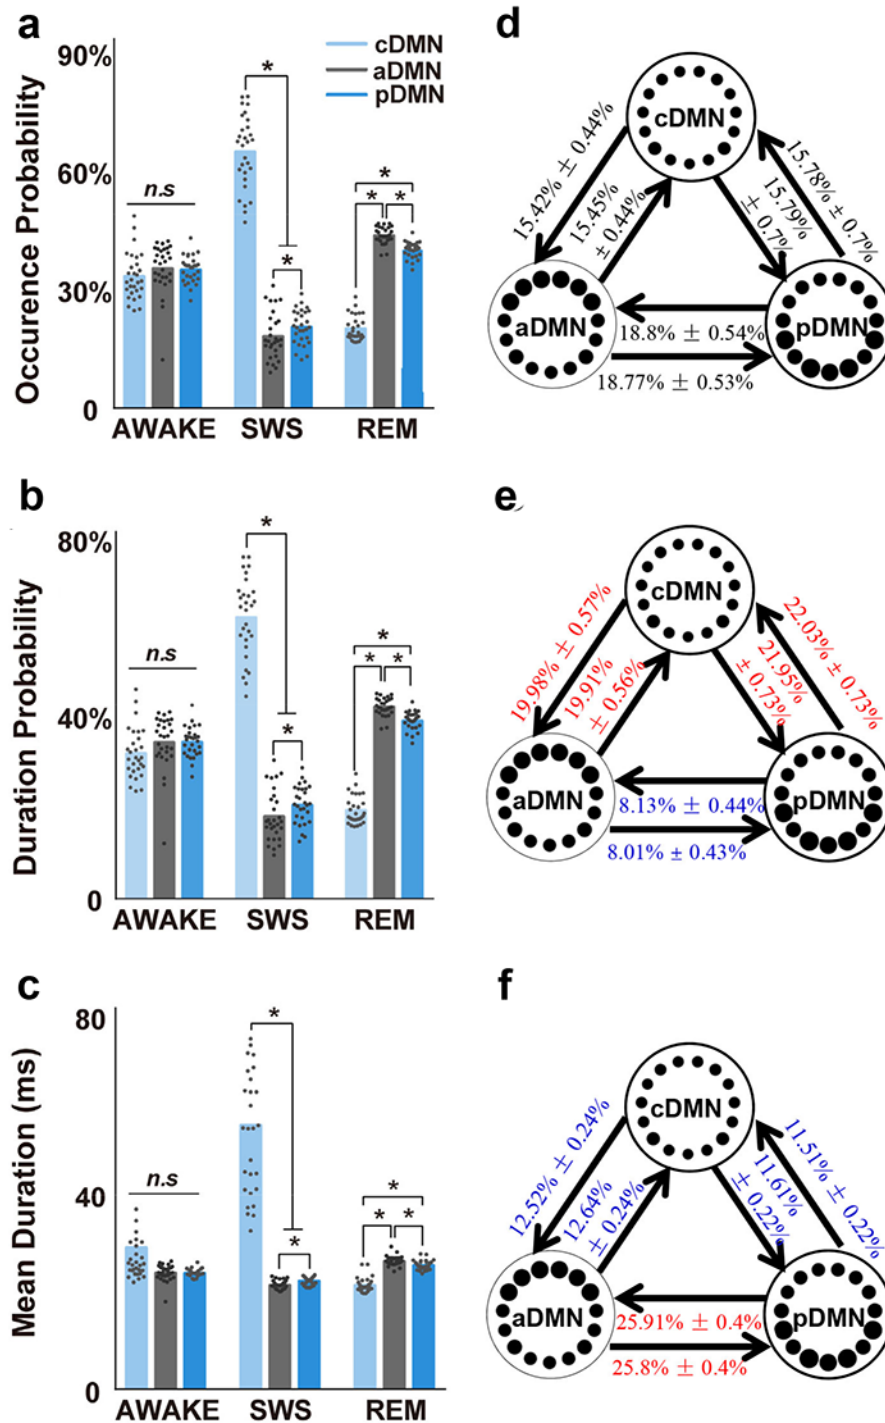

347

348

349

350

351

352

353

354

**Fig. 4.** Characteristics of CAMPs and the transitions among them in different stages of consciousness during wakefulness and sleep. (a) Comparisons of the occurrence probability for all CAMPs in the three stages. The black dots indicate the values of the occurrence probability obtained from 29 rats in different CAMPs and stages. The black stars indicate significant differences with a corrected  $p < 0.001$ . (b) Comparisons of the duration probability. (c) Comparisons of the mean duration. (d-f) The transition structures among CAMPs for the AWAKE (d), SWS (e) and REM sleep stages (f). All the numbers indicate the mean TPs calculated for the 29 rats and the standard deviation. The numbers in blue

355 indicate a significantly lower transition probability than observed in the AWAKE stage, and the  
356 numbers in red indicate a significantly higher transition probability. The significance level is a  
357 corrected  $p < 0.001$ .

358

359 these DMN regions for REM sleep (Fig. 3h-3j, red stars). In addition, the mean activity level  
360 of each CAMP exhibited a similar variation trend across different conscious stages. The lowest  
361 mean activity of CAMPs was observed in the SWS stage, while the highest mean activity was  
362 observed in the REM sleep stage (Fig. 3d).

363 **3.3. The constitutions and transitions of CAMPs during wakefulness and sleep.** The

364 configurations of these CAMPs involved in DMN dynamics in different conscious stages were

365 also distinct (Fig. 4a-4c). All CAMPs presented similar features in the AWAKE stage

366 (occurrence probability: 32.12%, 34.12% and 33.75%; duration probability: 31.68%, 34.15%

367 and 34.17%; and mean duration: 29.79 ms, 24.41 ms and 24.37 ms for the cDMN, aDMN and

368 pDMN, respectively. No significant differences in all features were observed.), indicating that

369 their roles were equivalent and a dynamic balance in DMN activity might exist among CAMPs

370 at wakeful rest. However, the cDMN became the dominant activity pattern of DMN dynamics

371 in the SWS stage, as indicated by its largest occurrence probability (62.66%, 17.56% and 19.78%

372 for the cDMN, aDMN and pDMN, respectively), duration probability (61.47%, 18.02% and

373 20.51% for the cDMN, aDMN and pDMN, respectively) and mean duration (55.58 ms, 21.89

374 ms and 22.78 ms for the cDMN, aDMN and pDMN, respectively) among all CAMPs. The

375 predominant constituent of the low-activity micropattern suggested that all the DMN regions

376 might be in a state of low activity and that the DMN activity preferred a silent pattern in deep

377 sleep. Unlike the SWS stage, the two high-activity micropatterns were the main CAMPs

378 observed in the REM sleep stage, as indicated by the remarkably larger values for all features

379 of the aDMN and pDMN than the cDMN (occurrence probability: 19.42%, 42.05% and  
380 38.53%; duration probability: 19.33%, 41.84% and 38.83%; and mean duration: 21.88 ms,  
381 26.92 ms and 26.01 ms for the cDMN, aDMN and pDMN, respectively). The greater  
382 percentage of high-activity micropatterns during REM sleep suggested a reactivation of DMN  
383 activity in this consciousness stage. In addition, in the comparison between the two high-  
384 activity micropatterns, the aDMN displayed significantly larger values for the three features,  
385 implying a more important role of the aDMN in REM sleep.

386       Meanwhile, the temporal concatenations of these CAMPs (i.e., the CAMP indices) in  
387 different consciousness stages also showed specific changes. We first performed a  
388 randomization test to examine the transition structures of these CAMP indices in different  
389 stages. The transitions among CAMPs occurred randomly in the AWAKE stage ( $p = 0.8157$ ),  
390 indicating that the transition probabilities (TPs) of pairs of CAMPs in the resting state were  
391 proportional to their occurrences. However, these transitions did not occur randomly in the  
392 SWS ( $p < 0.0001$ ) or REM sleep stages ( $p < 0.0001$ ), which suggested the stabilization of the  
393 structures of the CAMP indices during the sleep cycle. These stabilizations further implied the  
394 existence of several preferred transitions among CAMPs in the SWS and REM sleep stages.

395       Next, we compared the transition probabilities (TPs) for pairs of CAMPs between the two  
396 sleep stages and the AWAKE stage. The TPs of different pairs of CAMPs in the AWAKE stages  
397 were similar (no significant differences among all TPs, Fig. 4d), suggesting the presence of  
398 balanced state transitions among all CAMPs at rest. However, the TPs within the two high-  
399 activity micropatterns showed significant reductions in the SWS stage, while the TPs between  
400 high-activity micropatterns and the low-activity micropattern increased significantly (Fig. 4e).  
401 These changes in TPs emphasized the functional role of inhibitory activity in DMN regions in

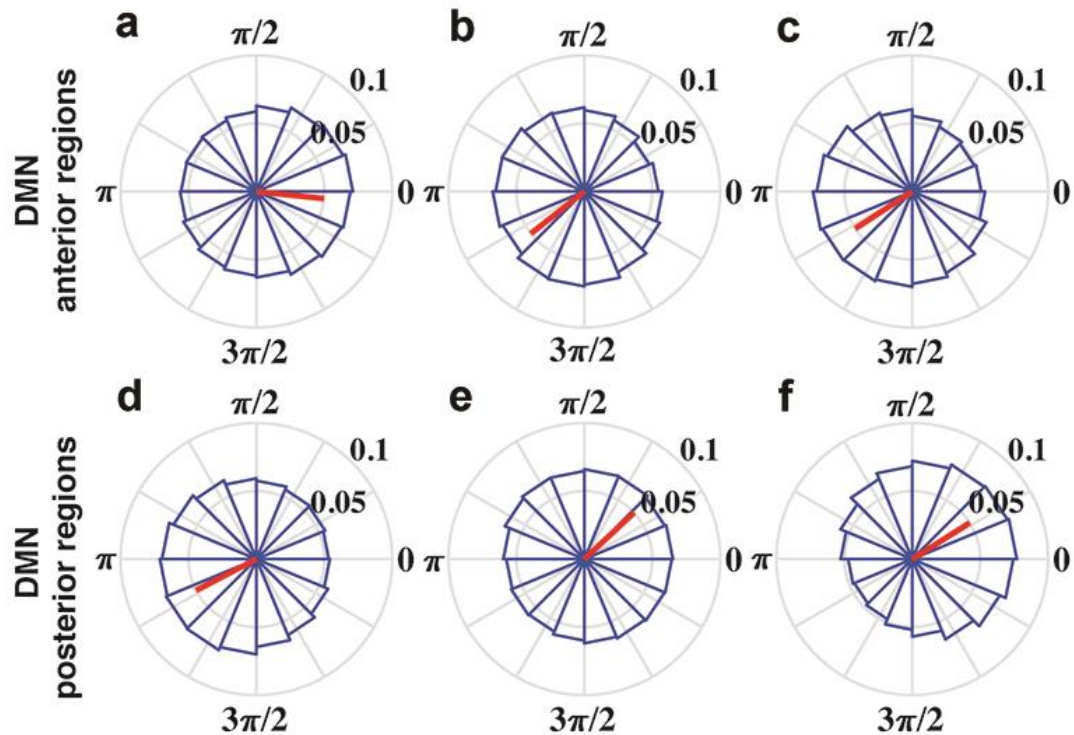

402

403 **Fig. 5.** Phase locking relationship between each CAMP with slow oscillations in the SWS stage. (a-c)

404 The phase locking relationships between the cDMN (a), aDMN (b) and pDMN (c) with the slow

405 oscillations in anterior DMN regions. (d-f) The phase locking relationships between the cDMN (d),

406 aDMN (e) and pDMN (f) with the slow oscillations in posterior DMN regions. The red lines showed

407 the significant directionality with Rayleigh test  $p < 0.001$ .

408

409 deep sleep. On the other hand, the TPs in the REM sleep stage displayed different alterations

410 than in the SWS stage, including significantly increased TPs within high-activity

411 micropatterns and a remarkable decrease in TPs between high-activity micropatterns and the

412 low-activity micropattern (Fig. 4f). The increased transitions within the two high-activity

413 micropatterns revealed increased activation of DMN regions during REM sleep. Based on

414 these findings, the CAMP indices and the functional roles of these CAMPs were specific for

415 different conscious stages. The alterations in DMN activity during wakefulness and sleep

416 might be attributed to the specific temporal combinations of the CAMPs constituting the

417 activity in different conscious stages rather than the spatial structures of CAMPs themselves,

418 which were rather stable across different stages.

### 419 **3.4. Strong phasic relationships between CAMPs with the up-down states in the SWS**

420 **stage.** Up-down states are considered the predominant pattern of slow oscillations (0.5-2 Hz)  
421 during the SWS stage. By estimating the phase distribution of each CAMP in the anterior and  
422 posterior DMN slow activity with the Hilbert transform, we observed that these CAMPs  
423 displayed strong phasic relationships with the up-down states in the SWS stage. The cDMN  
424 preferred the down state of anterior DMN activity (Fig. 5a, significant directionality:  $1.97\pi$ ,  
425 red line) and the up state of posterior DMN activity (Fig. 5d, significant directionality:  $1.16\pi$ ,  
426 red line). Additionally, both the aDMN and pDMN were phase locked to the up state of anterior  
427 DMN activity (Fig. 5b, significant directionality:  $1.21\pi$  for aDMN. Fig. 5c, significant  
428 directionality:  $1.18\pi$  for pDMN) and the down state of posterior DMN activity (Fig. 5e,  
429 significant directionality:  $0.23\pi$  for aDMN. Fig. 5f, significant directionality:  $0.18\pi$  for  
430 pDMN), implying that these two high-activity micropatterns might belong to the same activity  
431 pattern of slow oscillations of the DMN in deep sleep. Furthermore, the difference of  
432 significant directionality of all CAMPs suggested that the slow oscillations in anterior and  
433 posterior DMN regions tended to have a phasic shift about  $\pi$  during deep sleep. Accordingly,  
434 our proposed CAMPs could also reflect the up-down states of DMN slow activity in the SWS  
435 stage and there existed a close physiological association between the up-down states with  
436 DMN dynamics.

### 437 **4. Discussion**

438 In the present study, we developed a CAMP algorithm and applied it to reveal the  
439 dynamics of gamma activity in rat DMN during wakefulness and sleep. Our results indicated  
440 that the fast dynamics of gamma activity in the DMN were decomposed into three different

441 CAMPs (i.e., micropatterns) in different conscious stages, including the cDMN, aDMN and  
442 pDMN. These CAMPs showed stable spatial structures across wakefulness and sleep, while  
443 their dynamic configurations were specific to different conscious stages. In addition, all these  
444 CAMPs were strongly phase locked to the up-down states in the SWS stage, suggesting the  
445 temporal sequence of the neural relationship between up-down states and DMN dynamics.  
446 Our findings described the distinct dynamic configurations of gamma activity in the DMN  
447 during wakefulness and sleep, and proposed a three-state model to reveal the fundamental  
448 neural mechanism by which DMN dynamics mediate consciousness.

449 **4.1. Physiological significance of three CAMPs.** Previous studies have reported a strong  
450 correlation between electrophysiological gamma activity and blood oxygen level-dependent  
451 (BOLD) signals(Logothetis, 2002; Logothetis et al., 2001; Magri et al., 2012; Scheering et al.,  
452 2016). Besides, DMN regions also show deactivation in the gamma frequency during the  
453 performance of external tasks in several EEG studies(Karim Jerbi\*† et al., 2010; Ossandon et  
454 al., 2011), indicating the importance of gamma oscillation in DMN activity. Hence, we  
455 specifically focused on the fast dynamics of gamma activity in the DMN in the current study.  
456 The gamma activity in the rat DMN was decomposed into three stable CAMPs during  
457 wakefulness and sleep that exhibited distinct spatial structures. The differences in these  
458 CAMPs provided direct electrophysiological evidence that the DMN regions might not be  
459 activated simultaneously. Moreover, all these CAMPs lasted for approximately forty  
460 milliseconds, and different CAMPs had distinct periods. These phenomena exhibited  
461 differences in the activation times of anterior and posterior DMN structures in the fast  
462 dynamics and further illustrated the diversity in the latencies for both the excitation and  
463 inhibition of DMN regions(Brett L. Foster, Mohammad Dastjerdi, 2012; Foster et al., 2015).

464           Indeed, functional and neuroanatomical studies have separated the structure of the DMN  
465 into a parietal subnetwork and a prefrontal subnetwork in both human and animal brains(Cui  
466 et al., 2018; Hagmann et al., 2008; Lu et al., 2012; Wu et al., 2017). In the present study, we  
467 not only reinforced this finding from the aspect of fast DMN dynamics but also provided a  
468 possible dynamic substrate for this separation of the DMN structure. As a key component of  
469 the DMN, the prefrontal cortex has historically been posited to integrate interoceptive and  
470 exteroceptive information from multisensory stimuli for processing information about the  
471 internal and external milieu of the body(Ongur and Price, 2000). Accordingly, we speculated  
472 that the high-activity micropattern aDMN might be a type of DMN pattern that makes  
473 inferences and guides actions in a timely and environmentally relevant manner.

474           Meanwhile, the retrosplenial cortex (RSC) located in the parietal DMN, another key area  
475 in the DMN, has extensive connections and is topographically organized with the hippocampal  
476 formation. The projections between the RSC and hippocampal formation provide an important  
477 pathway regulating learning, memory and emotional behavior(Wyss and Vangroen, 1992).  
478 Furthermore, the hippocampal formation is a limbic structure that forms direct or indirect  
479 connections to the other DMN regions. Therefore, the high-activity micropattern pDMN  
480 detected in the present study might be a type of DMN activity pattern associated with memory  
481 and emotional behavior. Additionally, both the aDMN and pDMN were strongly phase locked  
482 to the up state of anterior DMN activity and the down state of posterior DMN activity during  
483 the SWS stage, indicating that they may reflect similar performance for the up-down states of  
484 slow oscillations during DMN dynamics. Moreover, these two high-activity micropatterns  
485 together accounted for more than 70% of the time in the resting state, which helps to explain  
486 why the brain requires a high basal cerebral blood flow and metabolism for spontaneous



487 activity(Raichle and Mintun, 2006).

488 In addition, we observed a low-activity micropattern (i.e., cDMN) in DMN dynamics that  
489 was widely distributed in all conscious stages during wakefulness and sleep. In the cDMN, all  
490 DMN regions displayed relatively lower levels of activity, implicating that cDMN could be  
491 viewed as the silent state for DMN activity in which all the DMN regions preferred relaxations  
492 and prepared for the next excitation. However, the cDMN was the only one micropattern  
493 during DMN dynamics in which all DMN regions operated in the same manner. Thus, the  
494 appearance of the cDMN suggested that there might be a working mode for DMN with low  
495 energy, which desired future work to study.

496 **4.2. The balance of dynamic DMN configurations supports consciousness during**  
497 **wakefulness.** Based on accumulating evidence, DMN activity is tightly correlated with  
498 consciousness levels in health and disease(Buckner et al., 2008; Kapogiannis et al., 2014;  
499 Panda et al., 2016; Vanhaudenhuyse et al., 2010). In the AWAKE stage, all the CAMPs showed  
500 similar features and the dynamic transitions among them were not statistically different. These  
501 similarities illustrated a balanced dynamic configuration among these CAMPs during fast  
502 gamma activity in the DMN at rest. The DMN is a key network involved in integrating high-  
503 order information from multiple sensory modalities based on numerous projections from  
504 variable somatic cortex and core limbic structures (HIP and amygdala) to the DMN  
505 regions(Heidbreder and Groenewegen, 2003; Reep et al., 1994). These projections provide the  
506 anatomical substrate for the correlation of DMN activity to consciousness levels. Accordingly,  
507 the identified balance of DMN dynamics might be a competitive product between the  
508 integration and differentiation of CAMPs in maintaining consciousness during wakefulness  
509 (Cavanna et al., 2018; Tononi, 2004; Tononi et al., 2016). Furthermore, this balance of

510 dynamic configurations also indicated that the DMN might function in multistable regimes  
511 and revealed the potential neural mechanism by which DMN activity supports cognitive  
512 functions in the resting state(Andrews-Hanna, 2012; Buckner et al., 2008).

### 513 **4.3. Functional reorganization of the dynamic configurations of the DMN during sleep.**

514 Compared to the resting state, the SWS stage was always accompanied by reduced brain  
515 activity, while the commensurate brain activity has been reported in the REM sleep  
516 stage(Hobson, 2009; Horovitz et al., 2008). Consistent alterations in the average brain activity  
517 associated with CAMPs during DMN dynamics were also observed in our study, suggesting  
518 that the activity of CAMPs might also reveal the changes in consciousness during wakefulness  
519 and sleep. However, the reduced activity of all CAMPs might not be the main explanation for  
520 the decrease in DMN activity observed during deep sleep, due to the stable spatial structures  
521 of these CAMPs during wakefulness and sleep. This decrease in activity might result from the  
522 increased occurrence probability of the cDMN and the decreased probabilities of the other two  
523 high-activity micropatterns. These inversely changed occurrence probabilities in different  
524 CAMPs revealed the neural mechanism of reduced activity, that the DMN regions preferred  
525 the silent state in deep sleep(Bazhenov et al., 2002; Diekelmann and Born, 2010).

526 The balance of dynamic configurations of the DMN was also disrupted during sleep,  
527 indicating the functional reorganization of DMN dynamics. The functional reorganization  
528 subsequently led to a loss of consciousness in different sleep stages(Tononi, 2004; Tononi et  
529 al., 2016). In the REM sleep stage, the dynamic transitions between aDMN and pDMN  
530 increased, indicating more communication between anterior and posterior DMN regions.  
531 These communications between anterior and posterior DMN regions might be crucial to  
532 primary consciousness, which has been postulated to be preserved in the REM sleep

533 stage(Hobson, 2009). Moreover, these communications displayed a combination of both the  
534 top-down and bottom-up mechanisms in the DMN. These two mechanisms are important for  
535 information processing in the brain(Buschman and Miller, 2007; Theeuwes, 2010), and an  
536 enhancement of these mechanisms might help us elucidate the underlying neurophysiological  
537 basis for the preservation of primary consciousness during REM sleep.

538 In the SWS stage, the dynamic transitions among CAMPs displayed different changes.  
539 The dynamic transitions between the low-activity micropattern and two high-activity  
540 micropatterns increased significantly. Additionally, a strong phasic relationship was observed  
541 between CAMPs and the up-down states during slow oscillations of the anterior and posterior  
542 DMN, and these two types of CAMPs corresponded to different up-down states. Accordingly,  
543 the dynamic transitions between the low-activity micropattern and two high-activity  
544 micropatterns were deemed to be the transitions within up-down states in the DMN. The  
545 dominant transitions of up-down states in deep sleep further provided the physiological  
546 importance for these increased dynamic transitions. However, the dynamic transitions within  
547 the two high-activity micropatterns decreased in the SWS stage. These reductions supported  
548 our hypothesis that communications between anterior and posterior DMN regions are  
549 important for primary consciousness, since both higher cognitive functions and primary  
550 consciousness are lost during deep sleep (Hobson and Pace-Schott, 2002). The loss of higher  
551 cognitive functions might not be caused by the change in a single type of dynamic transitions  
552 within pairs of CAMPs. We speculated that the balance of dynamic configurations of the DMN  
553 is the underlying neural mechanism supporting higher cognitive functions, which emerged in  
554 wakefulness and were deactivated during sleep. The coordination and cooperation of all  
555 CAMPs played a core role in the ability of the DMN to perform higher cognitive functions.

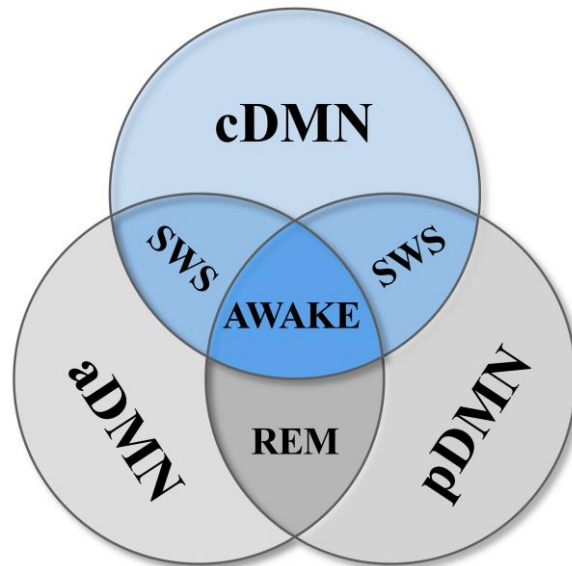

556

557 **Fig. 6.** The three-state model of the consciousness levels during wakefulness and sleep. The AWAKE  
558 stage requires the cooperation of all three CAMPs, while the SWS stage requires communications  
559 between the low-activity micropattern (cDMN) and the high-activity micropatterns (aDMN or pDMN).  
560 The REM sleep stage requires interactions within the two high-activity micropatterns.

561

562 Based on these findings, here, we propose a three-state model to describe the relationship  
563 between DMN micropatterns and the underlying consciousness levels observed during  
564 wakefulness and sleep. As shown in Fig. 6, the three CAMPs involved in DMN dynamics are  
565 the basis of this model and their interactions refer to the underlying mechanism regulating the  
566 consciousness level observed in distinct stages. Equal communications among the three  
567 CAMPs support conscious awareness in the AWAKE stage. The communications between the  
568 low-activity micropattern (i.e., cDMN) and each of the high-activity micropatterns (i.e.,  
569 aDMN or pDMN) are important for the SWS stage characterized by a low level of  
570 consciousness. However, during the REM sleep with primary consciousness, communications  
571 within high-activity micropatterns are the predominant.

572 According to the proposed three-state model, we conjecture that preservation of conscious  
573 awareness not only requires the information processing between anterior and posterior DMN

574 regions, but also need all DMN regions silent and relaxed during this process. Information  
575 processing within anterior and posterior DMN regions is mediated by up-down and bottom-  
576 up mechanisms and is vital for supporting conscious awareness and primary consciousness. A  
577 lack of this process could lead to the loss of consciousness in the SWS stage, and this process  
578 alone would result in the consciousness level of REM sleep stage that exists as primary  
579 consciousness. This phenomenon highlights the importance of the silent pattern for all DMN  
580 regions during the resting state with conscious awareness. However, the roles of the silent  
581 pattern in DMN regions and the communications within anterior and posterior DMN regions  
582 are unable to be validated by performing some other neurostimulation experiments using the  
583 currently available neuroimaging methods. Future studies could validate our model and apply  
584 it to the human brain through the application of other neuroimaging measures.

585 **4.4. Methodological Perspectives.** Consistent with the promising microstate analysis of  
586 EEG/LFP signals(Michel and Koenig, 2018), the CAMP analysis reported in the present study  
587 also assumes that brain activity consists of several distinct instantaneous patterns. The  
588 difference is that the CAMP method focuses on the nature of brain activity in different regions  
589 and extracts micropatterns from envelope signals. Envelope signals imply temporal alterations  
590 in brain power, and their decomposition directly reveals brain rhythm dynamics. In addition,  
591 the coactive patterns analyzed in the CAMP method were chosen based on the distribution of  
592 extreme values in the envelope signals of brain regions, which differs from the method used  
593 in a microstate analysis. Local extreme values in envelope signals represent the instantaneous  
594 higher/lower activity of brain regions followed by contrasting changes in activity. Therefore,  
595 the derived coactive patterns were considered as the activity patterns leading to an inversion  
596 of activity among regions in specific brain networks. Therefore, we postulate that this

597 proposed CAMP method will help researchers extract coactive micropatterns in specific brain  
598 networks and reveal additional underlying information about fast brain dynamics.

## 599 **5. Conclusion**

600 In the current work, we developed a CAMP algorithm to reveal the dynamics of gamma  
601 activity in rat DMN during wakefulness and sleep. The fast dynamics of gamma activity in the  
602 DMN could be decomposed into three different CAMPs, which showed stable spatial  
603 structures across three conscious stages. However, the dynamic configurations of them are  
604 specific to different conscious stages. Besides, we also indicated temporal sequence of the  
605 neural relationship between up-down states and these CAMPs during deep sleep. Taken  
606 together, our results provided functional descriptions for the dynamics of gamma activity in  
607 rat DMN during different conscious stage, and proposed a three-state model to reveal the  
608 fundamental neural associations between DMN activity with consciousness levels.

## 609 **CRedit authorship contribution statement**

610 Yan Cui: Methodology, Formal analysis, Visualization, Writing-Original draft preparation,  
611 Min Li: Methodology. Bharat Biswal: Investigation, Validation, Writing-Reviewing & Editing.  
612 Wei Jing: Data curation, Visualization. Changsong Zhou: Validation, Writing- Reviewing &  
613 Editing. Huixiao Liu: Formal analysis. Yang Xia: Conceptualization, Resources. Daqing Guo:  
614 Conceptualization, Visualization, Funding acquisition, Writing-Reviewing & Editing.  
615 Dezhong Yao: Conceptualization, Project administration, Supervision, Funding acquisition,  
616 Writing-Reviewing & Editing.

617 **Declaration of competing interest:** None

## 618 **Acknowledgements**

619 We thank Prof. Pedro A. Valdes-Sosa for valuable discussions and suggestions on this

620 work. This study was supported by the National Natural Science Foundation of China  
621 (81861128001, 61527815, 31771149, 61761166001, 61871420, 11975194 and 81901366), the  
622 Sichuan Science and Technology Program (Grant No. 2018HH0003), and the 111 project  
623 (Grant No. B12027).

## 624 **References**

- 625 Amzica, F., Steriade, M., 1995. Short- and long-range neuronal synchronization of the slow  
626 (<1 Hz) cortical oscillation. *J. Neurophysiol.* 73, 20–38.  
627 <https://doi.org/10.1152/jn.1995.73.1.20>
- 628 Andrews-Hanna, J.R., 2012. The Brain’s Default Network and its Adaptive Role in Internal  
629 Mentation. *Neuroscientist* 18, 251–270.  
630 <https://doi.org/10.1016/j.neuroimage.2013.08.045>
- 631 Bazhenov, M., Timofeev, I., Steriade, M., Sejnowski, T.J., 2002. Model of thalamocortical  
632 slow-wave sleep oscillations and transitions to activated states. *J. Neurosci.* 22, 1.
- 633 Beckmann, C.F., DeLuca, M., Devlin, J.T., Smith, S.M., 2005. Investigations into resting-state  
634 connectivity using independent component analysis. *Philos. Trans. R. Soc. B Biol. Sci.*  
635 360, 1001–1013. <https://doi.org/10.1098/rstb.2005.1634>
- 636 Brett L. Foster, Mohammad Dastjerdi, and J.P., 2012. Neural populations in human  
637 posteromedial cortex display opposing responses during memory and numerical  
638 processing. *Proc. Natl. Acad. Sci.* 109, 15514–15519.  
639 <https://doi.org/10.1073/pnas.1206580109/->  
640 [/DCSupplemental.www.pnas.org/cgi/doi/10.1073/pnas.1206580109](https://www.pnas.org/cgi/doi/10.1073/pnas.1206580109)
- 641 Buckner, R.L., Andrews-Hanna, J.R., Schacter, D.L., 2008. The brain’s default network:  
642 Anatomy, function, and relevance to disease. *Ann. N. Y. Acad. Sci.* 1124, 1–38.  
643 <https://doi.org/10.1196/annals.1440.011>
- 644 Buschman, T.J., Miller, E.K., 2007. Top-Down Versus Bottom-Up Control of Attention in the  
645 Prefrontal and. *Science (80-. )*. 315, 1860–1863. <https://doi.org/10.1126/science.1138071>
- 646 Cavanna, F., Vilas, M.G., Palmucci, M., Tagliazucchi, E., 2018. Dynamic functional  
647 connectivity and brain metastability during altered states of consciousness. *Neuroimage*

- 648 180, 383–395. <https://doi.org/10.1016/j.neuroimage.2017.09.065>
- 649 Cui, Y., Yu, S., Zhang, T., Zhang, Y., Xia, Y., Yao, D., Guo, D., 2018. Altered activity and  
650 information flow in the default mode network of pilocarpine-induced epilepsy rats. *Brain*  
651 *Res.* 1696, 71–80. <https://doi.org/10.1016/j.brainres.2018.05.012>
- 652 Diekelmann, S., Born, J., 2010. The memory function of sleep. *Nat. Rev. Neurosci.* 11, 114–  
653 26. <https://doi.org/10.1038/nrn2762>
- 654 Foster, B.L., Rangarajan, V., Shirer, W.R., Parvizi, J., 2015. Intrinsic and task-dependent  
655 coupling of neuronal population activity in human parietal cortex. *Neuron* 86, 578–590.  
656 <https://doi.org/10.1016/j.neuron.2015.03.018>
- 657 Fox, K.C.R., Foster, B.L., Kucyi, A., Daitch, A.L., Parvizi, J., 2018. Intracranial  
658 Electrophysiology of the Human Default Network. *Trends Cogn. Sci.*  
659 <https://doi.org/10.1016/j.tics.2018.02.002>
- 660 Fox, M.D., Snyder, A.Z., Vincent, J.L., Corbetta, M., Essen, C. Van, Raichle, M.E., Fox, M.D.,  
661 Snyder, A.Z., Vincent, J.L., Corbetta, M., Essen, D.C. Van, Raichle, M.E., 2016.  
662 Networks Linked references are available on JSTOR for this article : The human brain is  
663 intrinsically organized into dynamic , anticorrelated functional networks. *Proc. Natl.*  
664 *Acad. Sci. U. S. A.*
- 665 Gusnard, D.A., Akbudak, E., Shulman, G.L., Raichle, M.E., 2001. Medial prefrontal cortex  
666 and self-referential mental activity: Relation to a default mode of brain function. *Proc.*  
667 *Natl. Acad. Sci. U. S. A.* 98, 4259–4264. <https://doi.org/10.1073/pnas.071043098>
- 668 Hagmann, P., Cammoun, L., Gigandet, X., Meuli, R., Honey, C.J., Van Wendeen, J., Sporns, O.,  
669 2008. Mapping the structural core of human cerebral cortex. *PLoS Biol.* 6, 1479–1493.  
670 <https://doi.org/10.1371/journal.pbio.0060159>
- 671 Heidbreder, C.A., Groenewegen, H.J., 2003. The medial prefrontal cortex in the rat: Evidence  
672 for a dorso-ventral distinction based upon functional and anatomical characteristics.  
673 *Neurosci. Biobehav. Rev.* 27, 555–579. <https://doi.org/10.1016/j.neubiorev.2003.09.003>
- 674 Hobson, J.A., 2009. REM sleep and dreaming: Towards a theory of protoconsciousness. *Nat.*  
675 *Rev. Neurosci.* 10, 803–814. <https://doi.org/10.1038/nrn2716>
- 676 Hobson, J.A., Pace-Schott, E.F., 2002. The cognitive neuroscience of sleep: Neuronal systems,  
677 consciousness and learning. *Nat. Rev. Neurosci.* 3, 679–693.



- 678 <https://doi.org/10.1038/nrn915>
- 679 Holcman, D., Tsodyks, M., 2006. The emergence of up and down states in cortical networks.  
680 PLoS Comput. Biol. 2, 174–181. <https://doi.org/10.1371/journal.pcbi.0020023>
- 681 Horovitz, S.G., Fukunaga, M., De Zwart, J.A., Van Gelderen, P., Fulton, S.C., Balkin, T.J.,  
682 Duyn, J.H., 2008. Low frequency BOLD fluctuations during resting wakefulness and  
683 light sleep: A simultaneous EEG-fMRI study. Hum. Brain Mapp. 29, 671–682.  
684 <https://doi.org/10.1002/hbm.20428>
- 685 Ji, D., Wilson, M.A., 2007. Coordinated memory replay in the visual cortex and hippocampus  
686 during sleep. Nat. Neurosci. 10, 100–107. <https://doi.org/10.1038/nn1825>
- 687 Jing, W., Guo, D., Zhang, Y., Guo, F., Valdés-Sosa, P.A., Xia, Y., Yao, D., 2017. Reentrant  
688 information flow in electrophysiological rat default mode network. Front. Neurosci. 11,  
689 1–12. <https://doi.org/10.3389/fnins.2017.00093>
- 690 Kapogiannis, D., Reiter, D.A., Willette, A.A., Mattson, M.P., 2014. Dynamic functional  
691 connectivity of the default mode network tracks daydreaming. Neuroimage 100, 112–119.  
692 <https://doi.org/10.1016/j.neuroimage.2012.09.029.Posteromedial>
- 693 Karim Jerbi\*†, R., V.J., Tomas, O., Dalal, S.S., Julien Jung, D.H., Minotti, L., Bertrand1,  
694 O., Kahane, P., Lachaux, and J.-P., 2010. Exploring the electrophysiological correlates  
695 of the default-mode network with intracerebral EEG. Front. Syst. Neurosci. 4, 1–9.  
696 <https://doi.org/10.3389/fnsys.2010.00027>
- 697 Larson-Prior, L.J., Zempel, J.M., Nolan, T.S., Prior, F.W., Snyder, A., Raichle, M.E., 2009.  
698 Cortical network functional connectivity in the descent to sleep. Proc. Natl. Acad. Sci. U.  
699 S. A. 106, 4489–4494. <https://doi.org/10.1073/pnas.0900924106>
- 700 Lehmann, D., Faber, P.L., Galderisi, S., Herrmann, W.M., Kinoshita, T., Koukkou, M., Mucci,  
701 A., Pascual-Marqui, R.D., Saito, N., Wackermann, J., Winterer, G., Koenig, T., 2005.  
702 EEG microstate duration and syntax in acute, medication-naïve, first-episode  
703 schizophrenia: A multi-center study. Psychiatry Res. - Neuroimaging 138, 141–156.  
704 <https://doi.org/10.1016/j.psychresns.2004.05.007>
- 705 Liu, Q., Farahibozorg, S., Porcaro, C., Wenderoth, N., Mantini, D., 2017. Detecting large-scale  
706 networks in the human brain using high-density electroencephalography. Hum. Brain  
707 Mapp. 38, 4631–4643. <https://doi.org/10.1002/hbm.23688>

- 708 Liu, X., Chang, C., Duyn, J.H., 2013. Decomposition of spontaneous brain activity into  
709 distinct fMRI co-activation patterns. *Front. Syst. Neurosci.* 7, 1–11.  
710 <https://doi.org/10.3389/fnsys.2013.00101>
- 711 Liu, X., Duyn, J.H., 2013. Time-varying functional network information extracted from brief  
712 instances of spontaneous brain activity. *Proc. Natl. Acad. Sci. U. S. A.* 110, 4392–7.  
713 <https://doi.org/10.1073/pnas.1216856110>
- 714 Logothetis, N.K., 2002. The neural basis of the blood-oxygen-level-dependent functional  
715 magnetic resonance imaging signal. *Philos. Trans. R. Soc. B Biol. Sci.* 357, 1003–1037.  
716 <https://doi.org/10.1098/rstb.2002.1114>
- 717 Logothetis, N.K., Pauls, J., Augath, M., Trinath, T., Oeltermann, A., 2001. Neurophysiological  
718 investigation of the basis of the fMRI signal. *Nature* 412, 150–157.  
719 <https://doi.org/10.1038/35084005>
- 720 Lőrincz, M.L., Gunner, D., Bao, Y., Connelly, W.M., Isaac, J.T.R., Hughes, S.W., Crunelli, V.,  
721 2015. A distinct class of slow (~0.2–2 Hz) intrinsically bursting layer 5 pyramidal neurons  
722 determines UP/DOWN state dynamics in the neocortex. *J. Neurosci.* 35, 5442–5458.  
723 <https://doi.org/10.1523/JNEUROSCI.3603-14.2015>
- 724 Lu, H., Zou, Q., Gu, H., Raichle, M.E., Stein, E.A., Yang, Y., 2012. Rat brains also have a  
725 default mode network. *Proc. Natl. Acad. Sci. U. S. A.* 109, 3979–84.  
726 <https://doi.org/10.1073/pnas.1200506109>
- 727 Magri, C., Schridde, U., Murayama, Y., Panzeri, S., Logothetis, N.K., 2012. The Amplitude  
728 and Timing of the BOLD Signal Reflects the Relationship between Local Field Potential  
729 Power at Different Frequencies. *J. Neurosci.* 32, 1395–1407.  
730 <https://doi.org/10.1523/JNEUROSCI.3985-11.2012>
- 731 Michel, C.M., Koenig, T., 2018. EEG microstates as a tool for studying the temporal dynamics  
732 of whole-brain neuronal networks: A review. *Neuroimage* 180, 577–593.  
733 <https://doi.org/10.1016/j.neuroimage.2017.11.062>
- 734 Ongur, D., Price, J., 2000. The Organization of Networks within the Orbital and Medial  
735 Prefrontal Cortex of Rats, Monkeys and Humans. *Cereb. Cortex* 10, 206–219.  
736 <https://doi.org/10.1093/cercor/10.3.206>
- 737 Ossandon, T., Jerbi, K., Vidal, J.R., Bayle, D.J., Henaff, M.-A., Jung, J., Minotti, L., Bertrand,

- 738 O., Kahane, P., Lachaux, J.-P., 2011. Transient Suppression of Broadband Gamma Power  
739 in the Default-Mode Network Is Correlated with Task Complexity and Subject  
740 Performance. *J. Neurosci.* 31, 14521–14530. [https://doi.org/10.1523/JNEUROSCI.2483-](https://doi.org/10.1523/JNEUROSCI.2483-11.2011)  
741 11.2011
- 742 Panda, R., Bharath, R.D., Upadhyay, N., Mangalore, S., Chennu, S., Rao, S.L., 2016. Temporal  
743 Dynamics of the Default Mode Network Characterize Meditation-Induced Alterations in  
744 Consciousness. *Front. Hum. Neurosci.* 10, 1–12.  
745 <https://doi.org/10.3389/fnhum.2016.00372>
- 746 Petersen, C.C.H., Hahn, T.T.G., Mehta, M., Grinvald, A., Sakmann, B., 2003. Interaction of  
747 sensory responses with spontaneous depolarization in layer 2/3 barrel cortex. *Proc. Natl.*  
748 *Acad. Sci. U. S. A.* 100, 13638–13643. <https://doi.org/10.1073/pnas.2235811100>
- 749 Raichle, M.E., 2015. The Brain 's Default Mode Network. *Annu. Rev. Neurosci.* 413–427.  
750 <https://doi.org/10.1146/annurev-neuro-071013-014030>
- 751 Raichle, M.E., MacLeod, A.M., Snyder, A.Z., Powers, W.J., Gusnard, D.A., Shulman, G.L.,  
752 2001. A default mode of brain function. *Proc. Natl. Acad. Sci. U. S. A.* 98, 676–82.  
753 <https://doi.org/10.1073/pnas.98.2.676>
- 754 Raichle, M.E., Mintun, M.A., 2006. Brain work and brain imaging. *Annu. Rev. Neurosci.* 29,  
755 449–76. <https://doi.org/10.1146/annurev.neuro.29.051605.112819>
- 756 Reep, R.L., Chandler, H.C., King, V., Corwin, J. V., 1994. Rat posterior parietal cortex:  
757 topography of corticocortical and thalamic connections. *Exp. Brain Res.* 100, 67–84.  
758 <https://doi.org/10.1007/BF00227280>
- 759 Rosazza, C., Minati, L., 2011. Resting-state brain networks: Literature review and clinical  
760 applications. *Neurol. Sci.* 32, 773–785. <https://doi.org/10.1007/s10072-011-0636-y>
- 761 Sämann, P.G., Wehrle, R., Hoehn, D., Spormaker, V.I., Peters, H., Tully, C., Holsboer, F.,  
762 Czisch, M., 2011. Development of the brain's default mode network from wakefulness  
763 to slow wave sleep. *Cereb. Cortex* 21, 2082–2093. <https://doi.org/10.1093/cercor/bhq295>
- 764 Scheering, R., Koopmans, P.J., Van Mourik, T., Jensen, O., Norris, D.G., 2016. The  
765 relationship between oscillatory EEG activity and the laminar-specific BOLD signal.  
766 *Proc. Natl. Acad. Sci. U. S. A.* 113, 6761–6766. <https://doi.org/10.1073/pnas.1522577113>
- 767 Theeuwes, J., 2010. Top-down and bottom-up control of visual selection. *Acta Psychol.*

- 768 (Amst). 135, 77–99. <https://doi.org/10.1016/j.actpsy.2010.02.006>
- 769 Tononi, G., 2004. An information integration theory of consciousness., BMC neuroscience.  
770 BioMed Central. <https://doi.org/10.1186/1471-2202-5-42>
- 771 Tononi, G., Boly, M., Massimini, M., Koch, C., 2016. Integrated information theory: From  
772 consciousness to its physical substrate. Nat. Rev. Neurosci.  
773 <https://doi.org/10.1038/nrn.2016.44>
- 774 Vanhaudenhuyse, A., Noirhomme, Q., Tshibanda, L.J.F., Bruno, M.A., Boveroux, P.,  
775 Schnakers, C., Soddu, A., Perlberg, V., Ledoux, D., Brichant, J.F., Moonen, G., Maquet,  
776 P., Greicius, M.D., Laureys, S., Boly, M., 2010. Default network connectivity reflects the  
777 level of consciousness in non-communicative brain-damaged patients. Brain 133, 161–  
778 171. <https://doi.org/10.1093/brain/awp313>
- 779 Vidaurre, D., Smith, S.M., Woolrich, M.W., 2017. Brain network dynamics are hierarchically  
780 organized in time. Proc. Natl. Acad. Sci. 201705120.  
781 <https://doi.org/10.1073/pnas.1705120114>
- 782 Wu, X. jie, Zeng, L.L., Shen, H., Yuan, L., Qin, J., Zhang, P., Hu, D., 2017. Functional network  
783 connectivity alterations in schizophrenia and depression. Psychiatry Res. - Neuroimaging  
784 263, 113–120. <https://doi.org/10.1016/j.psychresns.2017.03.012>
- 785 Wyss, J.M., Vangroen, T., 1992. Connections between the retrosplenial cortex and the  
786 hippocampal-formation in the rat - a review. Hippocampus 2, 1–12.  
787 <https://doi.org/10.1002/hipo.450020102>
- 788
